# Supplementary material
Source: Royal Society of Chemistry journal article supplement (doi:10.1039/d6ea00027d)
Supplement: d6ea00027d1.pdf [file d6ea00027d1.pdf]

## Supplementary Material

### 5 List of supplementary tables

Table S1 Personal exposure to  $PM_{2.5}$  ( $\mu\text{g}/\text{m}^3$ ) for all the housewives group.

Table S2 Personal exposure to  $PM_{2.5}$  ( $\mu\text{g}/\text{m}^3$ ) for all the charcoal makers group.

10

Table S3 Personal exposure to  $PM_{2.5}$  ( $\mu\text{g}/\text{m}^3$ ) for all fish-smoking women group.

Table S4 Daily personal exposures to  $PM_{2.5}$  for all groups and impact of their domestic and commercial activities.

15

**Table S1** Personal exposure to PM<sub>2.5</sub> (µg/m<sup>3</sup>) for all the housewives group

| <b>ID</b> | <b>Mean</b> | <b>Stdev</b> | <b>Min</b> | <b>Max</b> | <b>SC</b>   | <b>Group</b> |
|-----------|-------------|--------------|------------|------------|-------------|--------------|
| YSI01     | 246.5       | 42.9         | 179.1      | 340.2      | <b>4C7</b>  | G3           |
| YSI02     | 279.7       | 88.5         | 153.0      | 481.2      | <b>5B9</b>  | G3           |
| YSI03     | 178.6       | 33.7         | 127.5      | 263.5      | <b>1C4</b>  | G1           |
| YSI04     | 201.6       | 43.9         | 136.2      | 285.4      | <b>1C5</b>  | G1           |
| YSI05     | 369.4       | 142.6        | 150.6      | 832.6      | <b>9B4</b>  | G3           |
| YSI06     | 263.8       | 52.3         | 194.9      | 378.8      | <b>3A7</b>  | G2           |
| YSI07     | 205.5       | 48.8         | 103.5      | 301.4      | <b>6C7</b>  | G3           |
| YSI08     | 219.7       | 91.6         | 95.0       | 567.9      | <b>1B5</b>  | G1           |
| YSI09     | 243.9       | 53.4         | 172.9      | 366.6      | <b>4C5</b>  | G3           |
| YSI10     | 192.1       | 34.8         | 142.9      | 269.7      | <b>6B5</b>  | G3           |
| YSI11     | 226.5       | 53.4         | 141.3      | 341.5      | <b>1B2</b>  | G1           |
| YSI12     | 219.6       | 40.3         | 148.6      | 315.2      | <b>1A4</b>  | G1           |
| YSI13     | 223.8       | 57.6         | 138.4      | 376.6      | <b>4B9</b>  | G3           |
| YSI14     | 399.0       | 167.0        | 139.0      | 696.5      | <b>3D7</b>  | G2           |
| YSI15     | 224.8       | 49.2         | 149.7      | 316.2      | <b>1C4</b>  | G1           |
| YSI17     | 235.4       | 75.2         | 150.5      | 555.7      | <b>2B4</b>  | G2           |
| YSI18     | 237.0       | 59.3         | 149.7      | 367.5      | <b>1B2</b>  | G1           |
| YSI19     | 224.6       | 95.3         | 136.0      | 503.0      | <b>2B4</b>  | G2           |
| YSI20     | 302.7       | 81.9         | 172.6      | 428.3      | <b>3B5m</b> | G2           |
| YSI21     | 231.7       | 44.0         | 160.6      | 310.2      | <b>5C5</b>  | G3           |
| YSI22     | 201.9       | 40.1         | 131.4      | 267.2      | <b>1B7</b>  | G1           |
| YSI23     | 272.5       | 84.7         | 154.9      | 523.6      | <b>1B2m</b> | G1           |
| YSI24     | 228.1       | 48.8         | 141.2      | 364.5      | <b>2A5</b>  | G2           |
| YSI25     | 210.7       | 42.2         | 124.3      | 293.9      | <b>5A5</b>  | G3           |
| YSI26     | 183.9       | 37.9         | 127.6      | 265.5      | <b>1B7</b>  | G1           |
| YSI27     | 204.8       | 38.4         | 158.7      | 288.0      | <b>1C5</b>  | G1           |
| YSI28     | 214.2       | 45.1         | 111.6      | 318.0      | <b>3B5</b>  | G2           |
| YSI29     | 184.6       | 41.9         | 106.8      | 266.5      | <b>3B7</b>  | G2           |
| YSI30     | 186.4       | 43.6         | 122.1      | 291.9      | <b>3C4</b>  | G2           |
| YSI31     | 247.5       | 54.5         | 154.9      | 348.7      | <b>1C4</b>  | G1           |

With ID, Mean, Stdev, Min, Max, SC and Group (G1, G2, G3) correspond respectively to identifier, arithmetic mean, standard deviation, minimum, maximum, source code and subgroup less expose (G1), moderately expose (G2) and very expose (G3).

**Table S2** Personal exposure to PM<sub>2.5</sub> (µg/m<sup>3</sup>) for all the charcoal makers group

| <b>ID</b>                | <b>Mean</b>  | <b>Stdev</b> | <b>Min</b>   | <b>Max</b>   | <b>SC</b>   | <b>Group</b> |
|--------------------------|--------------|--------------|--------------|--------------|-------------|--------------|
| CAI01                    | 263.2        | 51.3         | 196.4        | 352.6        | <b>4C4</b>  | G2           |
| CAI02                    | 357.1        | 113.8        | 218.9        | 524.0        | <b>4B4m</b> | G2           |
| CAI03                    | 204.1        | 48.6         | 140.5        | 281.8        | <b>2D6</b>  | G1           |
| CAI04                    | 207.9        | 64.3         | 149.2        | 332.7        | <b>2D3</b>  | G1           |
| CAI05                    | 386.5        | 113.8        | 248.3        | 562.8        | <b>3A4m</b> | G1           |
| CAI06                    | 445.8        | 117.5        | 265.3        | 599.8        | <b>7B6</b>  | G3           |
| CAI07                    | 253.0        | 37.2         | 191.5        | 321.9        | <b>4C6</b>  | G2           |
| CAI08                    | 320.9        | 162.3        | 151.4        | 521.4        | <b>7C5</b>  | G3           |
| <i>CAI09<sup>a</sup></i> | <i>218.6</i> | <i>62.6</i>  | <i>136.9</i> | <i>332.3</i> | <i>4C2</i>  | <i>G2</i>    |
| CAI10                    | 155.7        | 34.7         | 114.5        | 225.3        | <b>4A7</b>  | G2           |
| CAI11                    | 191.4        | 57.1         | 127.0        | 294.5        | <b>4C5</b>  | G2           |
| CAI12                    | 285.5        | 116.6        | 161.4        | 480.7        | <b>3C6</b>  | G1           |
| CAI13                    | 236.0        | 41.1         | 156.6        | 285.1        | <b>5D4</b>  | G2           |
| CAI14                    | 237.9        | 48.5         | 165.2        | 306.4        | <b>4C3</b>  | G2           |
| <i>CAI15<sup>a</sup></i> | <i>165.3</i> | <i>56.0</i>  | <i>109.3</i> | <i>308.0</i> | <i>5C2</i>  | <i>G2</i>    |
| CAI16                    | 401.4        | 233.6        | 130.8        | 882.7        | <b>7C4</b>  | G3           |
| CAI17                    | 501.8        | 76.4         | 367.5        | 648.5        | <b>9A1</b>  | G3           |
| CAI18                    | 270.1        | 66.3         | 177.3        | 334.0        | <b>5C3</b>  | G2           |
| CAI19                    | 207.8        | 66.9         | 149.7        | 403.8        | <b>4C7</b>  | G2           |
| CAI20                    | 220.7        | 40.0         | 162.9        | 284.3        | <b>3C5</b>  | G1           |
| CAI21                    | 259.8        | 43.5         | 188.6        | 319.9        | <b>5C4</b>  | G2           |
| CAI22                    | 283.4        | 70.1         | 144.9        | 380.3        | <b>6B5</b>  | G3           |
| CAI24                    | 162.2        | 44.8         | 97.7         | 258.0        | <b>3C3</b>  | G1           |
| CAI25                    | 190.1        | 29.2         | 130.4        | 233.5        | <b>3C2</b>  | G1           |
| <i>CAI26<sup>a</sup></i> | <i>210.6</i> | <i>68.2</i>  | <i>136.5</i> | <i>380.5</i> | <i>5C5</i>  | <i>G2</i>    |
| CAI27                    | 227.5        | 101.4        | 140.9        | 517.2        | <b>2C5</b>  | G1           |
| CAI28                    | 250.2        | 98.8         | 178.4        | 394.0        | <b>2B3</b>  | G1           |
| CAI29                    | 204.0        | 52.1         | 111.5        | 282.4        | <b>3C5</b>  | G1           |
| CAI30                    | 281.7        | 61.6         | 200.8        | 384.9        | <b>5B8</b>  | G2           |
| CAI31                    | 309.2        | 138.0        | 144.1        | 541.7        | <b>4B3m</b> | G2           |
| CAI32                    | 305.3        | 106.7        | 163.7        | 529.9        | <b>5C9m</b> | G2           |
| CAI33                    | 345.3        | 93.8         | 216.2        | 483.2        | <b>6B5</b>  | G3           |

With ID, Mean, Stdev, Min, Max, SC and Group (G1, G2, G3) correspond respectively to identifier, arithmetic mean, standard deviation, minimum, maximum, source code and subgroup less expose (G1), moderately expose (G2) and very expose (G3). <sup>a</sup> refers to the men in the charcoal makers' group.

35 **Table S3** Personal exposure to PM<sub>2.5</sub> (µg/m<sup>3</sup>) for all fish-smoking women group

| <b>ID</b>                | <b>Mean</b> | <b>Stdev</b> | <b>Min</b> | <b>Max</b> | <b>SC</b>   | <b>Group</b> |
|--------------------------|-------------|--------------|------------|------------|-------------|--------------|
| <i>DLI01<sup>a</sup></i> | 307.4       | 118.9        | 198.7      | 514.3      | <b>2D5</b>  | G2           |
| <i>DLI02<sup>a</sup></i> | 231.3       | 119.9        | 95.4       | 403.2      | <b>2A5</b>  | G2           |
| <i>DLI03<sup>a</sup></i> | 271.0       | 143.2        | 104.6      | 484.1      | <b>2B4</b>  | G2           |
| <i>DLI04<sup>a</sup></i> | 399.3       | 118.8        | 192.4      | 582.5      | <b>4B8</b>  | G3           |
| <i>DLI05<sup>a</sup></i> | 267.5       | 123.9        | 143.4      | 441.8      | <b>2B3</b>  | G2           |
| DLI06                    | 137.0       | 52.0         | 58.9       | 254.5      | <b>1A6</b>  | G1           |
| DLI07                    | 221.3       | 80.4         | 78.1       | 381.7      | <b>2B4</b>  | G2           |
| DLI08                    | 383.3       | 386.4        | 90.6       | 1708.7     | <b>3B2</b>  | G2           |
| DLI09                    | 116.7       | 34.9         | 77.0       | 203.2      | <b>1A2</b>  | G1           |
| DLI10                    | 149.7       | 46.4         | 71.2       | 230.0      | <b>1B1</b>  | G1           |
| DLI11                    | 522.7       | 404.7        | 97.6       | 1586.9     | <b>2B5m</b> | G2           |
| DLI12                    | 437.9       | 265.1        | 98.4       | 1154.9     | <b>3B7m</b> | G2           |
| DLI13                    | 198.8       | 132.8        | 71.6       | 659.2      | <b>1B4</b>  | G1           |
| DLI14                    | 259.2       | 86.4         | 97.4       | 399.5      | <b>1A2m</b> | G1           |
| DLI15                    | 843.6       | 550.8        | 110.2      | 2216.2     | <b>6C1</b>  | G3           |
| DLI16                    | 159.9       | 56.7         | 66.0       | 254.3      | <b>1B3</b>  | G1           |
| DLI17                    | 313.5       | 136.3        | 85.4       | 608.0      | <b>2B6m</b> | G2           |
| DLI18                    | 401.4       | 289.7        | 53.8       | 1298.1     | <b>4A3</b>  | G3           |
| DLI19                    | 199.0       | 109.4        | 72.1       | 464.7      | <b>1B3</b>  | G1           |
| DLI20                    | 393.5       | 234.0        | 85.1       | 1016.2     | <b>3B2</b>  | G2           |
| DLI21                    | 1128.5      | 970.0        | 63.8       | 4103.8     | <b>9B3</b>  | G3           |
| DLI22                    | 170.2       | 82.8         | 75.1       | 372.2      | <b>1A3</b>  | G1           |
| DLI23                    | 168.6       | 116.6        | 62.7       | 552.6      | <b>2A4</b>  | G2           |
| DLI24                    | 293.1       | 162.6        | 77.9       | 520.2      | <b>3A2</b>  | G2           |
| DLI25                    | 107.9       | 44.5         | 50.5       | 192.0      | <b>1A3</b>  | G1           |
| DLI26                    | 814.4       | 639.0        | 86.3       | 2737.6     | <b>6B4</b>  | G3           |
| DLI27                    | 585.7       | 397.5        | 91.9       | 1827.7     | <b>5B3</b>  | G3           |
| DLI28                    | 233.2       | 126.9        | 55.7       | 453.3      | <b>2B3</b>  | G2           |

With ID, Mean, Stdev, Min, Max, SC and Group (G1, G2, G3) correspond respectively to identifier, arithmetic mean, standard deviation, minimum, maximum, source code and subgroup less expose (G1), moderately expose (G2) and very expose (G3). <sup>a</sup> represent fish-smoking women of neighborhood.

40

45

**Table S4** Daily personal exposures to PM<sub>2.5</sub> for all groups and impact of their domestic and commercial activities.

|               | <b>DPE<sub>CA</sub> (µg/m<sup>3</sup>)</b> | <b>DPE<sub>O</sub> (µg/m<sup>3</sup>)</b> | <b>DPE<sub>T</sub> (µg/m<sup>3</sup>)</b> | <b>% CA</b> |
|---------------|--------------------------------------------|-------------------------------------------|-------------------------------------------|-------------|
| <b>G1-YSI</b> | 60.1 ± 14.1                                | 186.0 ± 42.9                              | 246.1 ± 37.3                              | 25 ± 7      |
| <b>G2-YSI</b> | 91.7 ± 38.9                                | 231.7 ± 130.8                             | 323.5 ± 151.2                             | 30 ± 11     |
| <b>G3-YSI</b> | 100.9 ± 69.7                               | 188.9 ± 20.7                              | 289.8 ± 88.6                              | 32 ± 10     |
| <b>YSI</b>    | 81.9 ± 46.6                                | 200.6 ± 77.2                              | 282.4 ± 100.4                             | 29 ± 10     |
| <b>G1-CAI</b> | 85.9 ± 49.3                                | 181.8 ± 49.4                              | 267.7 ± 83.2                              | 31 ± 11     |
| <b>G2-CAI</b> | 93.3 ± 24.2                                | 216.0 ± 93.9                              | 309.3 ± 101.5                             | 31 ± 8      |
| <b>G3-CAI</b> | 208.1 ± 78.8                               | 292.4 ± 74.2                              | 500.6 ± 97.6                              | 41 ± 13     |
| <b>CAI</b>    | 112.5 ± 64.7                               | 219.6 ± 85.8                              | 332.2 ± 125.0                             | 33 ± 10     |
| <b>G1-DLI</b> | 57.1 ± 58.2                                | 252.0 ± 242.1                             | 309.1 ± 278.8                             | 18 ± 16     |
| <b>G2-DLI</b> | 318.4 ± 165.0                              | 188.2 ± 112.0                             | 506.6 ± 204.5                             | 62 ± 17     |
| <b>G3-DLI</b> | 698.5 ± 316.0                              | 249.2 ± 93.8                              | 947.8 ± 300.4                             | 71 ± 18     |
| <b>DLI</b>    | 315.9 ± 294.0                              | 221.8 ± 160.0                             | 537.6 ± 337.0                             | 50 ± 28     |

50 With: DPE<sub>CA</sub>, the daily personal exposure related to the domestic and commercial combustion activity; DPE<sub>O</sub>, the daily personal exposure related to other activities; DPE<sub>T</sub>, the total daily personal exposure; % CA, the fraction of DPE<sub>CA</sub> to DPE<sub>T</sub> ; YSI refer to housewives; CAI to charcoal makers; DLI to fish-smoking women and G1, G2, G3 the subgroups (G1-YSI refer to subgroup G1 of housewives).

55

60

65

70

## List of supplementary figures

80

Fig.S1 Linear regression representing optical sensor concentrations as a function of filtration system concentrations case of housewives.

85 Fig.S2 Linear regression representing optical sensor concentrations as a function of filtration system concentrations case of charcoal makers.

Fig.S3 Linear regression representing optical sensor concentrations as a function of filtration system concentrations case of fish-smoking women.

90

Fig.S4 Representation of the mean daily personal exposure to  $PM_{2.5}$  of each participant according to the source code sorted in ascending order based on road traffic for : a) Housewives; b) Charcoal makers; c) Fish-smoking women

95 Fig.S5 Representation of the mean daily personal exposure to  $PM_{2.5}$  of each participant according to the source code sorted in ascending order based on indirect sources for : a) Housewives; b) Charcoal makers; c) Fish-smoking women.

100

105

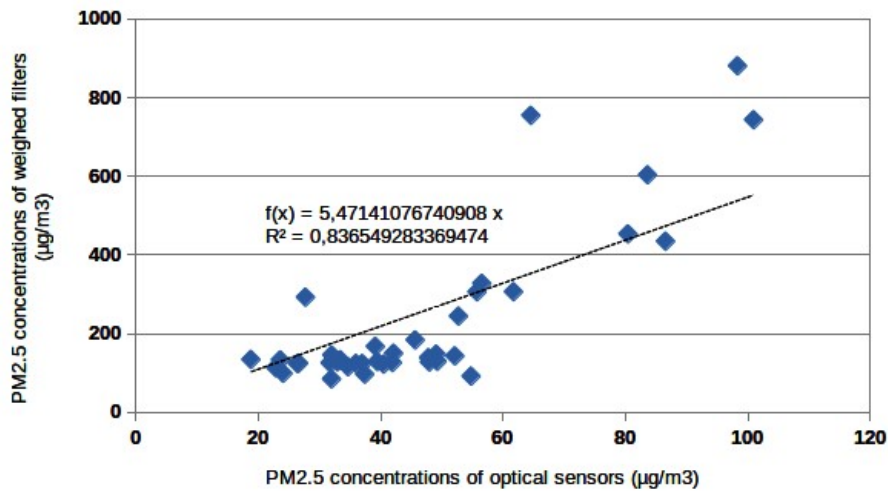

110

Fig.S1 Linear regression representing optical sensor concentrations as a function of filtration system concentrations case of housewives ( $y = 5.5x$ ,  $R^2 = 0.8$ ,  $p < 10^{-10}$ ).

115

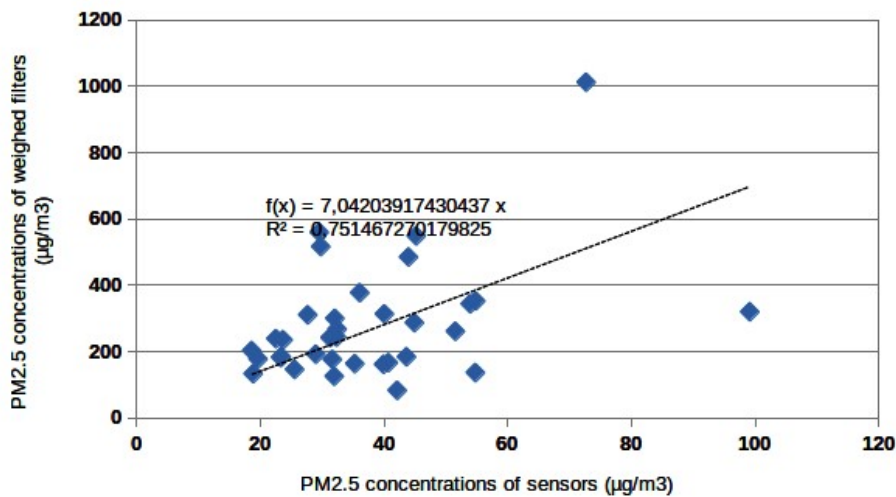

Fig.S2 Linear regression representing optical sensor concentrations as a function of filtration system concentrations case of charcoal makers ( $y = 7.04x$ ,  $R^2 = 0.8$ ,  $p < 10^{-10}$ ).

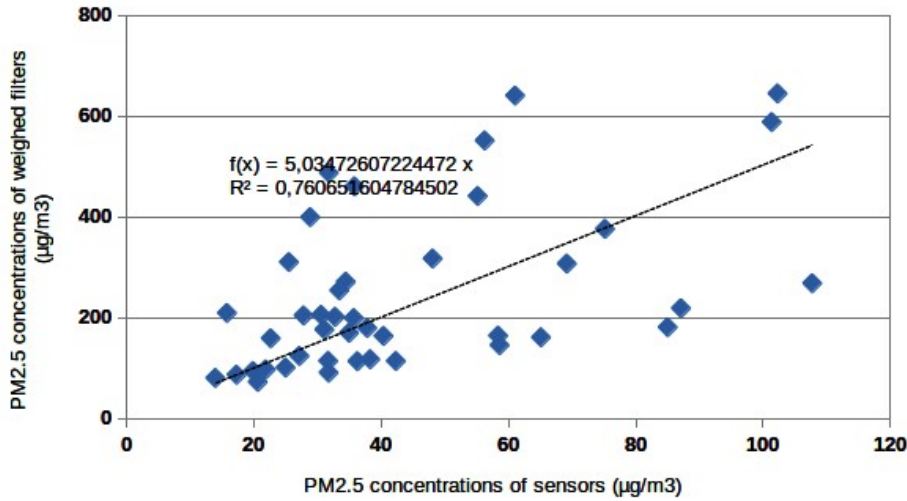

120

Fig.S3 Linear regression representing optical sensor concentrations as a function of filtration system concentrations case of fish-smoking women ( $y = 5.03x$ ,  $R^2 = 0.8$ ,  $p < 10^{-10}$ ).

125

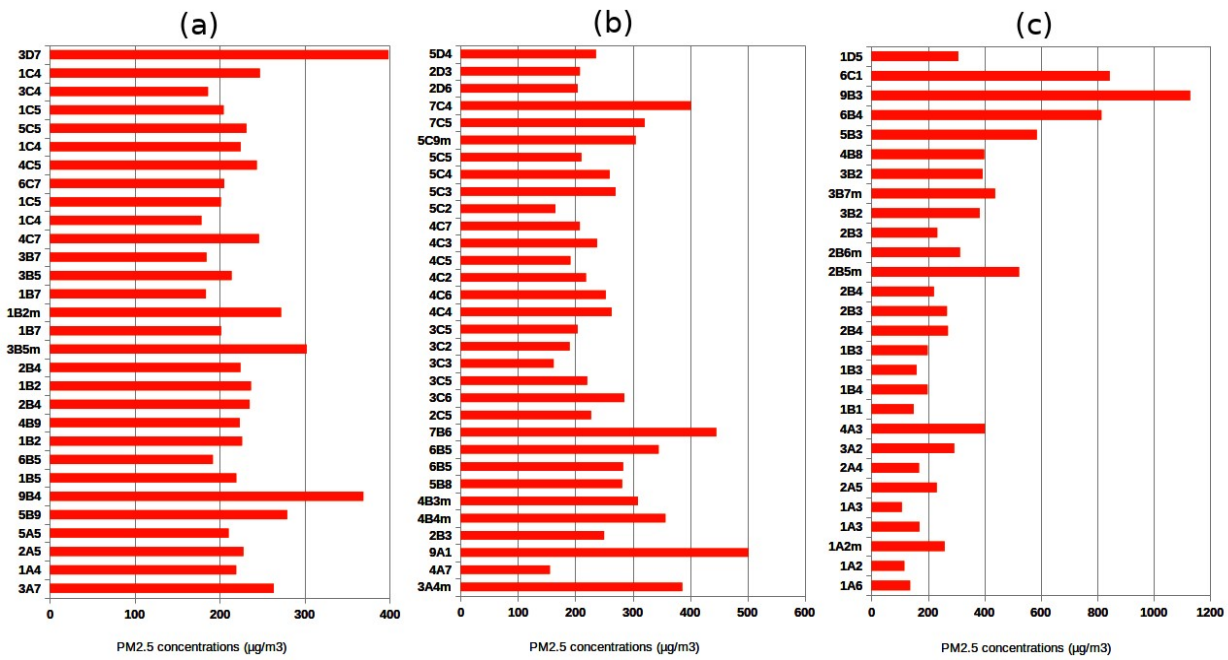

Fig.S4 Representation of the mean daily personal exposure to  $\text{PM}_{2.5}$  of each participant according to the source code sorted in ascending order based on road traffic for : a) Housewives; b) Charcoal makers; c) Fish-smoking women

130

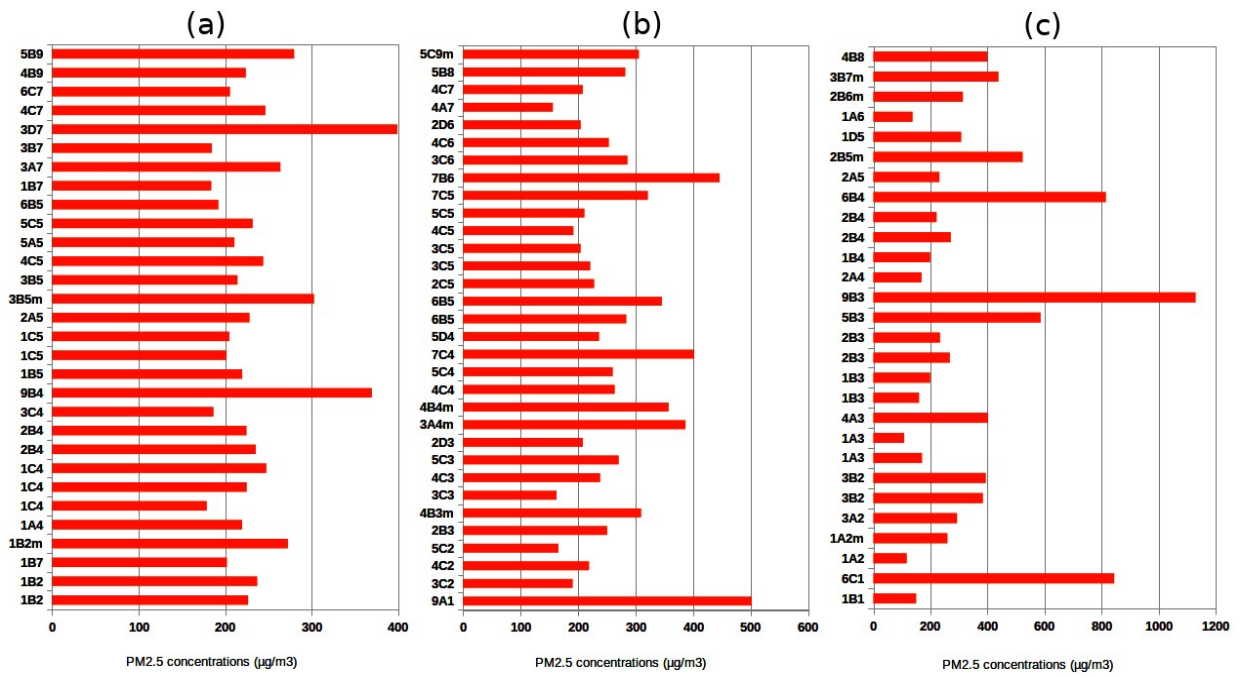

Fig.S5 Representation of the mean daily personal exposure to PM<sub>2.5</sub> of each participant according to the source code sorted in ascending order based on indirect sources for : a) Housewives; b) Charcoal makers; c) Fish-smoking women.
